# Supplementary material for: Co-transfer of antigen and contextual information harmonises peripheral and lymph node cDC activation
Source: Sci Immunol. Author manuscript; Available in PMC 2024 May 29. (PMC7616026; doi:10.1126/sciimmunol.adg8249)
Supplement: Supplementary Materials [file EMS196319-supplement-Supplementary_Materials.pdf]

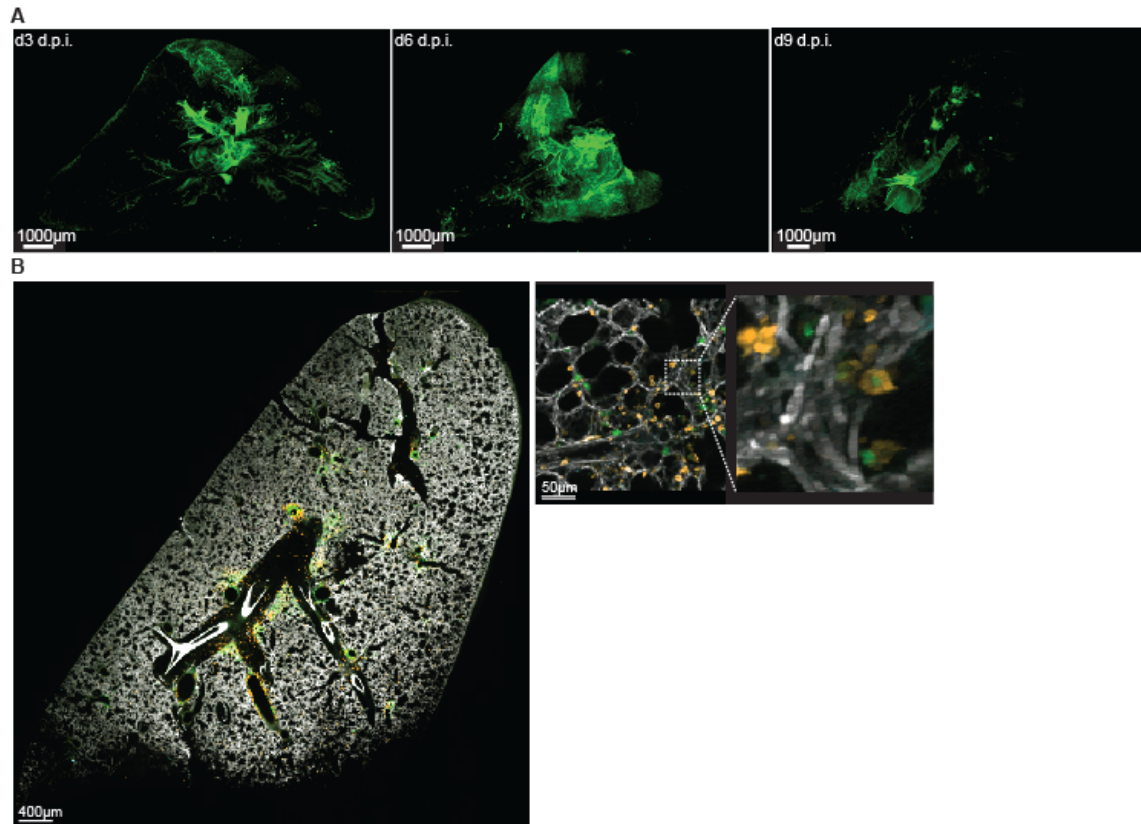

**Fig. S1. BrightFlu infects regionally and ZsGreen is engulfed by neutrophils**

(A) 2% agarose inflated middle lobes were harvested at indicated timepoints post infection with 100pfu BrightFlu, cleared in ethyl cinnamate and imaged by light sheet microscopy. Scale bar = 1mm (B) 2% agarose inflated left lungs were harvested at day 3 post infection with 100pfu BrightFlu, and 200µm sections cut by vibratome. Sections were stained for CD3, S100A9 and CD31 before clearing with Ce3D solution. Sections were imaged by confocal microscopy.

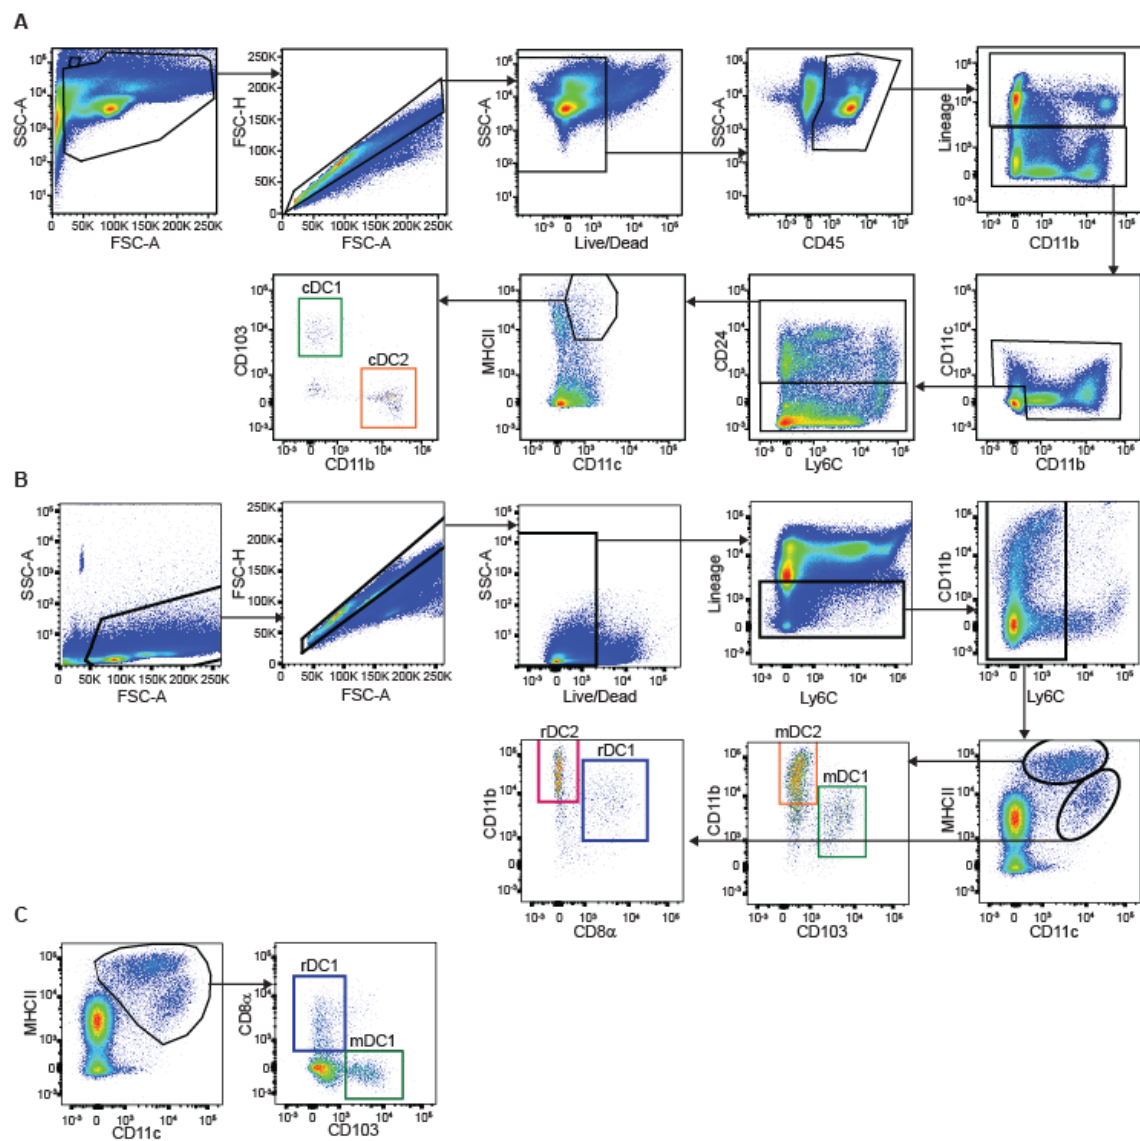

**Fig. S2. Representative flow gating for cDC in lung and LN**

(A-B) Representative flow of cDC gating in lung (A) and LN (B) Also alternative MHCII insensitive gating of mDC1 and rDC1 to confirm identity (C).

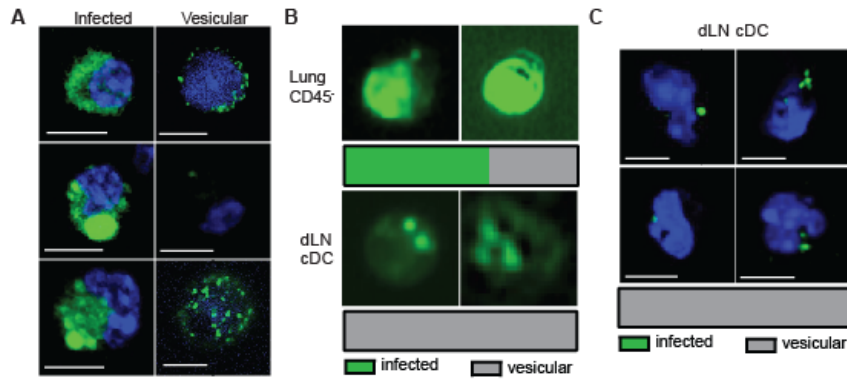

**Fig. S3. ZsGreen+ cDC have acquired antigen from infected cells and are not themselves infected**

(A) BMDC were infected with BrightFlu *in vitro* or incubated with B16-F10 ZsGreen tumour cells and imaged by confocal microscopy. Scale bar = 10µm (B) Sorted lung CD45<sup>+</sup>ZsGreen<sup>+</sup> cells and LN ZsGreen<sup>+</sup> cDC were analysed by Imagestream. Bars display proportion of cells examined with cytosolic or vesicular distribution of ZsGreen (C) Sorted LN ZsGreen<sup>+</sup> cDC were analysed by confocal microscopy. Bars display proportion of cells examined with cytosolic or vesicular distribution of ZsGreen.

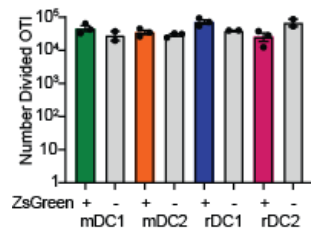

**Fig. S4. SIINFEKL pulsed sorted cDC subsets are all able to stimulate OTI proliferation**

Quantification of live, divided OTI T cells activated by Sorted ZsGreen<sup>+</sup> and ZsGreen<sup>-</sup> cDC subsets from LN pulsed with SIINFEKL for 72 hours. Cells were sorted from n=20 mice, 3 replicates for condition

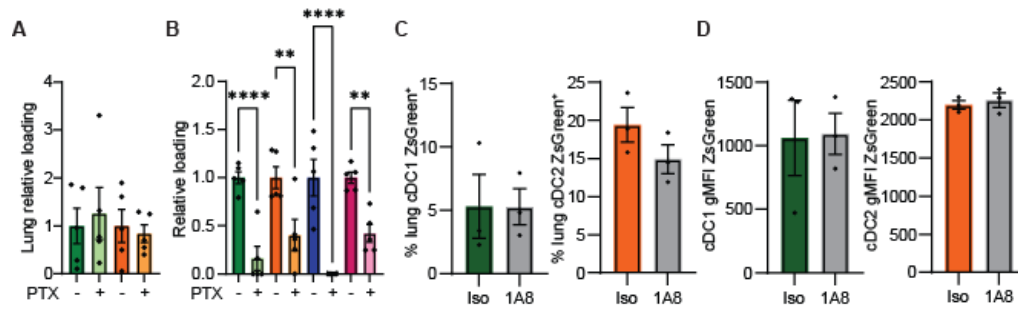

**Fig. S5. PTX treatment blocks antigen transfer to rDC in a neutrophil independent manner**

(A-B) ZsGreen loading of lung cDC (A) and LN cDC subsets (B) were assessed by flow cytometry at d6 post infection with 100pfu BrightFlu in the presence or absence of PTX (n=10, 2 experiments). (C-D) Lungs were harvested from mice at d6 post infection with BrightFlu +/- neutrophil depletion and the percentage of cDC subsets loaded with ZsGreen was analysed by flow cytometry (C) and the level of ZsGreen carried by loaded cDC was assessed by measuring gMFI (n=6, 2 experiments) (D). Statistical differences were determined by student T test. P values: \*P < 0.05 and \*\*P < 0.01. Data are shown as mean  $\pm$  SEM

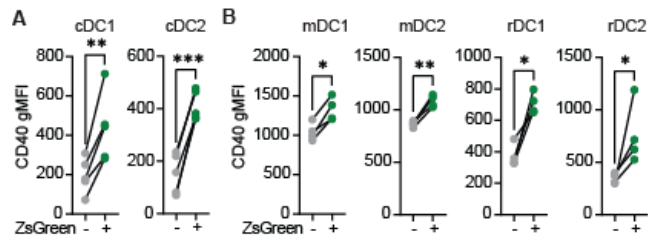

**Fig. S6. CD40 is upregulated by cDC subsets upon acquisition of ZsGreen**

Lungs were harvested from mice at d6 post infection with BrightFlu and the gMFI of ZsGreen in ZsGreen<sup>+</sup> (green) and ZsGreen<sup>-</sup> (grey) cDC from the lung (A) and LN (B) (n=10, 2 experiments) Statistical. Statistical differences were determined by student T test. P values: \*P < 0.05, \*\*P < 0.01 and \*\*\* P<0.001. Data are shown as mean ± SEM

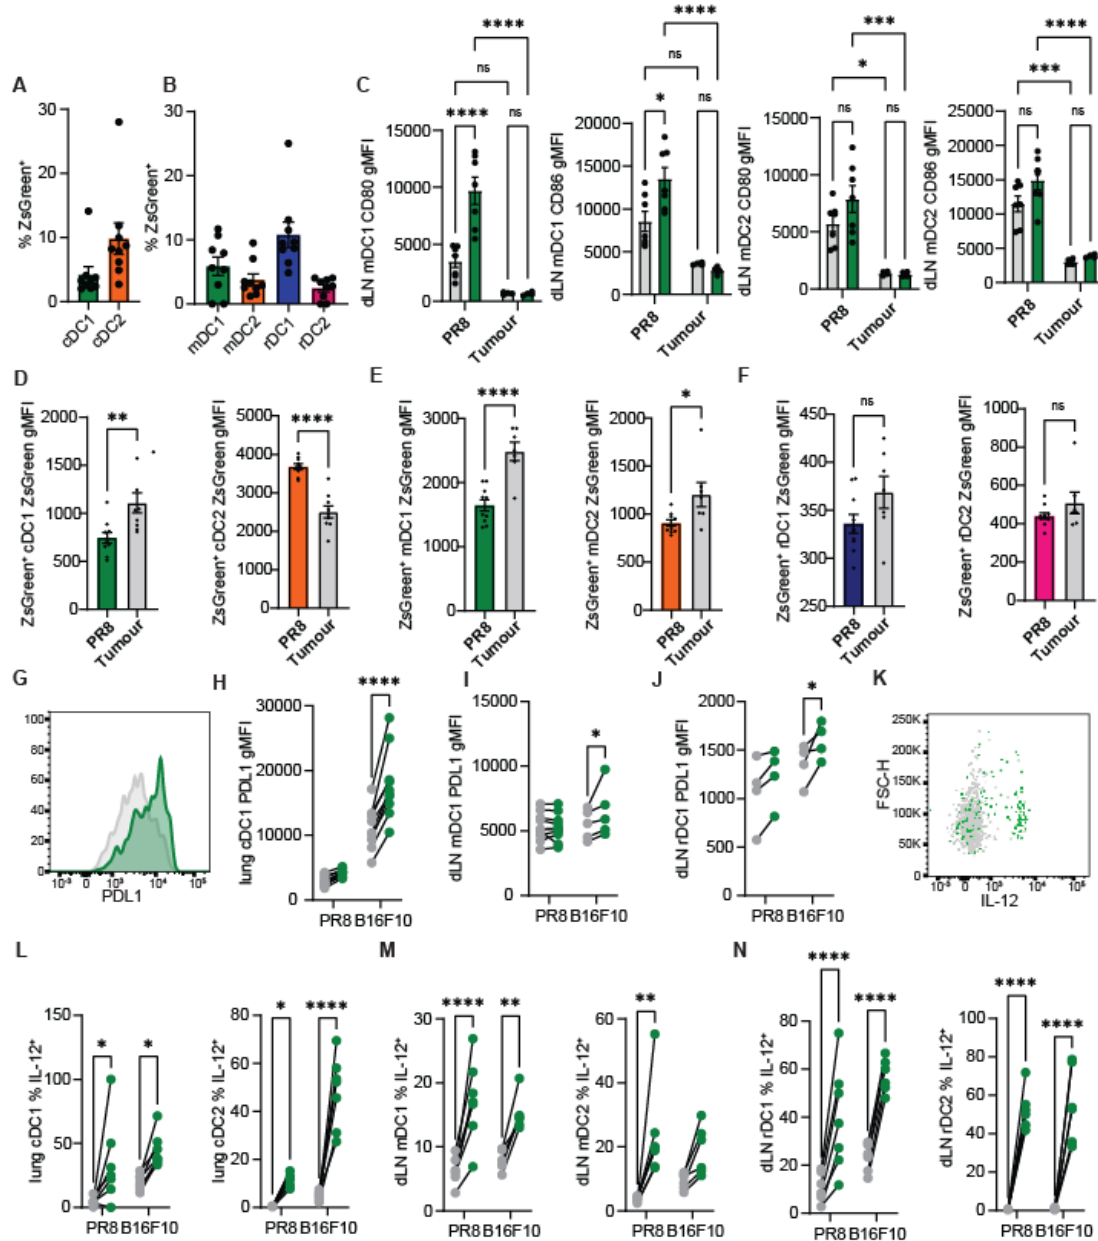

**Fig. S7. Tumour antigen loaded rDC are differentially activated in BrightFlu and B16ZsGreen**

Lungs and medLN were harvested from mice at d6 post infection with BrightFlu or at d14 post i.v. injection of B16ZsGreen. (A-B) ZsGreen loading was observed in lung (A) and LN (B) cDC subsets (n=9, 3 experiments) (C) CD80 and CD86 gMFI for mDC1 and mDC2 +/- ZsGreen was analysed by flow cytometry in the medLN (n=11, 3 experiments). (D-F) gMFI of ZsGreen in ZsGreen<sup>+</sup> cDC, was analysed by flow cytometry in the lung (D) and in the medLN in the mDC (E) and rDC (n=19, 3 experiments) (F). (G-J) gMFI of PD-L1 of ZsGreen<sup>+</sup> and ZsGreen<sup>-</sup> cDC, was analysed by flow cytometry, representative flow plot of ZsGreen<sup>+</sup> cells (green) and ZsGreen<sup>-</sup> cells (grey) (G). Quantification of gMFI in the lung (H) and in the medLN in the mDC (I) and rDC (n=20, 3 experiments) (J) (K-N) The percent of cDC1 +/- ZsGreen positive for IL-12 was analysed by flow cytometry. Representative flow plot for IL-12 stain in ZsGreen<sup>+</sup> (green) and ZsGreen<sup>-</sup> cDC (K). Quantification of IL-12 stain in the lung (L) and in the medLN in the mDC (M) and rDC

(N). Statistical differences were determined by Student's t-test. P values: ns  $P > 0.05$ ; \* $P < 0.05$ ; \*\* $P < 0.01$ ; \*\*\* $P < 0.001$  and \*\*\*\* $P < 0.0001$ .

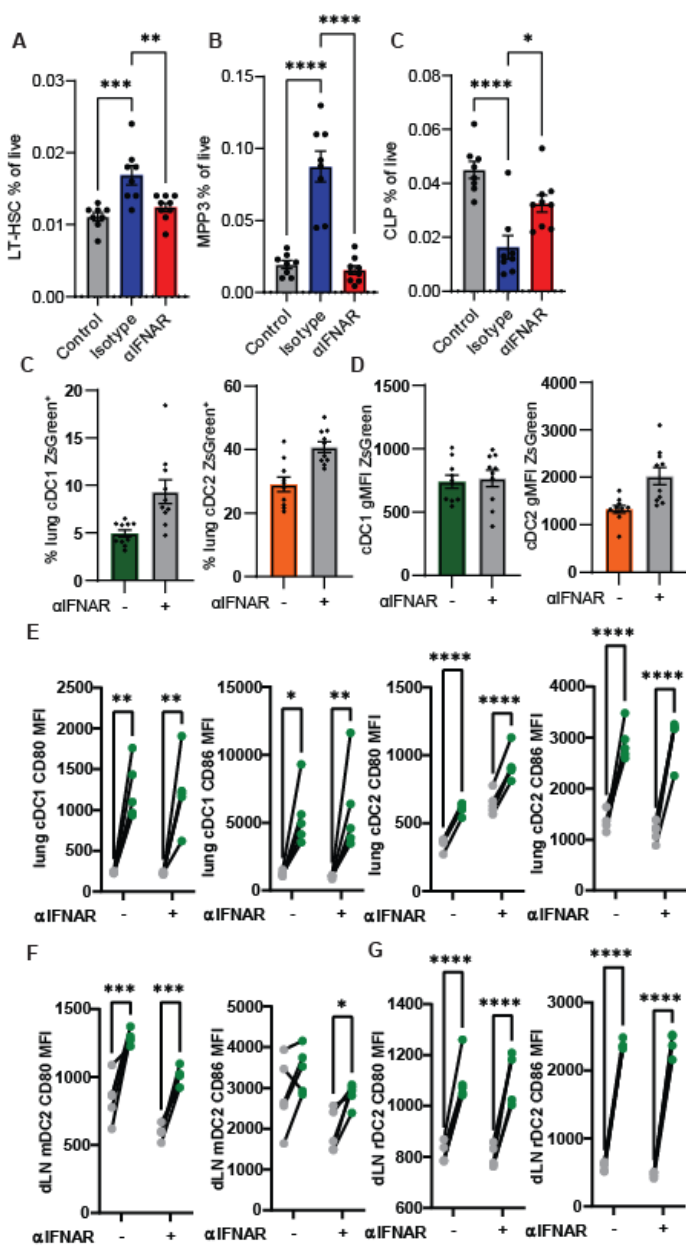

**Fig. S8. Blockade of type I IFN signalling does not alter cDC activation in the lung or LN**

(A-C) Bone marrow was harvested from mice at d6 post infection with BrightFlu with or without blocking antibody against the type I IFN receptor and the proportion of live cells made up of long-term haematopoietic stem cells (LT-HSC) (A), type 3 multipotent progenitors (MPP3) (B) and common lymphoid progenitors (CLP) (C) was assessed by flow cytometry (n=25, 3 experiments). (C-D) Lungs were harvested from mice at d6 post infection with BrightFlu in the presence of blocking antibody against type I IFN receptor or isotype control and the percentage of cDC subsets loaded with ZsGreen was analysed by flow cytometry (C) and the level of ZsGreen carried by loaded cDC was assessed by measuring gMFI of ZsGreen (n=20, 3 experiments) (D). (E-G) Lungs and medLN were harvested from mice at d6 post infection with BrightFlu in the presence of blocking antibody against type I IFN receptor or isotype control and the MFI of CD80 and CD86 was assessed by flow cytometry on antigen bearing and non-bearing cDC subsets in the lung (E) and in mDC2 (F) and rDC2 (G) within the medLN (n=10, 3 experiments). Statistical differences were

determined by one-way ANOVA with Tukey post-test. P values: \*P < 0.05; \*\*P<0.01; \*\*\*P<0.001 and \*\*\*\*P < 0.0001. Data are shown as mean  $\pm$  SEM

| <b>Antibody</b> | <b>Fluorescence</b> | <b>Species</b> | <b>Clone</b> | <b>Catalogue number</b> | <b>Company</b> |
|-----------------|---------------------|----------------|--------------|-------------------------|----------------|
| CD45            | AF700               | mouse          | 30-F11       | 103128                  | Biolegend      |
| CD45.1          | Percp5.5            | mouse          | A20          | 110728                  | Biolegend      |
| CD45.2          | BV421               | mouse          | 104          | 109832                  | Biolegend      |
| CD11B           | BV605               | mouse          | M1/70        | 101257                  | Biolegend      |
| CD11B           | BV650               | mouse          | M1/70        | 101259                  | Biolegend      |
| CD11B           | BV421               | mouse          | M1/70        | 101236                  | Biolegend      |
| CD11C           | BV650               | mouse          | N418         | 117339                  | Biolegend      |
| IL-12/IL-23     | Percp5.5            | mouse          | C15.6        | 505211                  | Biolegend      |
| LY6C            | BV711               | mouse          | HK1.4        | 128037                  | Biolegend      |
| LY6C            | BV785               | mouse          | HK1.4        | 128041                  | Biolegend      |
| LY6C            | AF700               | mouse          | HK1.4        | 128023                  | Biolegend      |
| LY6G            | BV785               | mouse          | 1A8          | 127645                  | Biolegend      |
| Siglec-F        | BV786               | mouse          | E50-2440     | 740956                  | BD             |
| MHCII           | AF700               | mouse          | M5/114.15.2  | 107622                  | Biolegend      |
| MHCII           | BV421               | mouse          | M5/114.15.2  | 107632                  | Biolegend      |
| CD24            | PECY7               | mouse          | M1/69        | 101822                  | Biolegend      |
| CD103           | APC                 | mouse          | 2E7          | 121414                  | Biolegend      |
| CD103           | Percp5.5            | mouse          | 2E           | 121416                  | Biolegend      |
| Epcam           | BV650               | mouse          | G8.8         | 118241                  | Biolegend      |
| CD31            | APC                 | mouse          | 390          | 102410                  | Biolegend      |
| B220            | BV785               | mouse          | RA3-6B2      | 103224                  | Biolegend      |
| CD90.2          | BV785               | mouse          | 30-H12       | 105331                  | Biolegend      |
| CD3             | BV785               | mouse          | 145-2C11     | 100355                  | Biolegend      |
| CD3             | AF700               | mouse          | 17A2         | 100216                  | Biolegend      |
| CD4             | AF647               | mouse          | RM4-5        | 100530                  | Biolegend      |
| CD8             | BV605               | mouse          | 53-6.7       | 100743                  | Biolegend      |
| CD80            | PE                  | mouse          | 16-10A1      | 104708                  | Biolegend      |
| CD86            | BV510               | mouse          | GL-1         | 105040                  | Biolegend      |
| CD40            | Percp5.5            | mouse          | 3/23         | 124623                  | Biolegend      |
| CCR7            | PE                  | mouse          | 4B12         | 120105                  | Biolegend      |
| PDL1            | BV711               | mouse          | 10F.9G2      | 124319                  | Biolegend      |
| Zombie          | Nir™ Dye            |                |              | 77184                   | Biolegend      |

**Table. S1. List of used antibodies**
